# Supplementary material
Source: MDPI journal article supplement (https://www.mdpi.com/2076-3417/11/19/9018)
Supplement: s1 [file s1]

**Table S3. Content of the forms and values of Cu pollution indices in sandy soils**

| City | Land use / Horizon |      | Depth  | Cu <sub>t</sub> | Cu <sub>a</sub> | Fractions [mg/kg] |      |       |       | Cu indices                     |                |                  |       |
|------|--------------------|------|--------|-----------------|-----------------|-------------------|------|-------|-------|--------------------------------|----------------|------------------|-------|
|      |                    |      |        | [mg/kg]         |                 | I                 | II   | III   | IV    | C <sub>a</sub> /C <sub>t</sub> | C <sub>f</sub> | I <sub>geo</sub> | BF    |
| BP   | DG                 | Ap   | 0-20   | 28.23           | 16.77           | 0.00              | 0.00 | 11.69 | 16.54 | 59.39                          | 2.61           | 0.80             | 41.41 |
|      |                    | A    | 20-36  | 28.03           | 15.77           | 0.00              | 0.00 | 10.69 | 17.34 | 56.25                          | 2.59           | 0.79             | 38.14 |
|      |                    | A/C  | 36-65  | 18.43           | 7.98            | 0.00              | 0.00 | 2.85  | 15.58 | 43.28                          | 1.70           | 0.18             | 15.46 |
|      |                    | CG   | 65-111 | 18.58           | 4.88            | 0.00              | 0.00 | 0.00  | 18.58 | 26.27                          | 1.72           | 0.19             | 0.00  |
|      |                    | G    | >111   | 10.82           | 3.44            | 0.00              | 0.00 | 0.00  | 10.82 | 31.82                          | -              | -                | 0.00  |
|      | AG                 | Ap   | 0-20   | 16.73           | 8.42            | 0.51              | 0.00 | 2.21  | 14.01 | 50.30                          | 1.18           | 0.00             | 16.27 |
|      |                    | A    | 20-32  | 16.68           | 8.20            | 0.00              | 0.00 | 1.69  | 14.99 | 49.14                          | 1.18           | 0.00             | 10.13 |
|      |                    | Es   | 32-69  | 14.48           | 9.43            | 0.00              | 0.00 | 0.00  | 14.48 | 65.13                          | 1.02           | 0.00             | 0.00  |
|      |                    | Bhs  | 69-91  | 13.88           | 4.49            | 0.00              | 0.00 | 0.00  | 13.88 | 32.37                          | 0.98           | 0.00             | 0.00  |
|      |                    | CG   | >91    | 14.13           | 3.75            | 0.00              | 0.00 | 0.00  | 14.13 | 26.55                          | -              | -                | 0.00  |
|      | A                  | Ap   | 0-27   | 9.26            | 4.29            | 0.00              | 0.00 | 0.00  | 9.26  | 46.35                          | 3.30           | 1.14             | 0.00  |
|      |                    | Es   | 27-47  | 2.02            | 1.61            | 0.00              | 0.00 | 0.00  | 2.02  | 79.80                          | 0.72           | 0.00             | 0.00  |
|      |                    | Bhs  | 47-82  | 7.13            | 2.81            | 0.00              | 0.00 | 0.00  | 7.13  | 39.35                          | 2.54           | 0.76             | 0.00  |
|      |                    | C    | >82    | 2.81            | 1.18            | 0.00              | 0.00 | 0.00  | 2.81  | 42.06                          | -              | -                | 0.00  |
| LU   | DG                 | Ap   | 0-20   | 10.10           | 6.71            | 0.00              | 0.00 | 0.87  | 9.23  | 66.44                          | 1.80           | 0.26             | 8.58  |
|      |                    | A    | 20-35  | 15.68           | 5.99            | 0.00              | 0.00 | 0.00  | 15.68 | 38.18                          | 2.80           | 0.90             | 0.00  |
|      |                    | Bv   | 35-65  | 9.94            | 3.67            | 0.00              | 0.00 | 0.00  | 9.94  | 36.91                          | 1.78           | 0.24             | 0.00  |
|      |                    | C    | >65    | 5.60            | 2.22            | 0.00              | 0.00 | 0.00  | 5.60  | 39.63                          | -              | -                | 0.00  |
|      | AG                 | Ap   | 0-20   | 16.93           | 8.12            | 0.00              | 0.00 | 0.16  | 16.77 | 47.96                          | 2.67           | 0.83             | 0.94  |
|      |                    | A    | 20-35  | 12.98           | 6.71            | 0.00              | 0.00 | 0.00  | 12.98 | 51.72                          | 2.05           | 0.45             | 0.00  |
|      |                    | Bhs  | 35-50  | 10.43           | 4.46            | 0.00              | 0.00 | 0.00  | 10.43 | 42.72                          | 1.65           | 0.13             | 0.00  |
|      |                    | G    | 50-67  | 10.02           | 2.61            | 0.00              | 0.00 | 0.00  | 10.02 | 26.04                          | 1.58           | 0.08             | 0.00  |
|      |                    | C    | >67    | 6.33            | 2.55            | 0.00              | 0.00 | 0.00  | 6.33  | 40.22                          | -              | -                | 0.00  |
|      | A                  | Ap   | 0-20   | 9.38            | 3.25            | 0.00              | 0.00 | 0.00  | 9.38  | 34.62                          | 0.89           | 0.00             | 0.00  |
|      |                    | Bv   | 20-50  | 9.80            | 1.69            | 0.00              | 0.00 | 0.00  | 9.80  | 17.28                          | 0.93           | 0.00             | 0.00  |
|      |                    | C    | >50    | 10.58           | 1.66            | 0.00              | 0.00 | 0.00  | 10.58 | 15.68                          | -              | 0.00             | 0.00  |
| T    | DG                 | Ap   | 0-20   | 25.73           | 11.57           | 0.00              | 1.49 | 3.98  | 20.26 | 44.95                          | 0.78           | 0.00             | 21.24 |
|      |                    | A    | 20-40  | 23.43           | 12.37           | 0.00              | 0.61 | 3.18  | 19.64 | 52.78                          | 0.71           | 0.00             | 16.18 |
|      |                    | A    | 40-65  | 23.53           | 11.90           | 0.00              | 0.45 | 2.77  | 20.31 | 50.57                          | 0.72           | 0.00             | 13.67 |
|      |                    | AG   | 65-90  | 41.63           | 10.62           | 0.00              | 0.46 | 2.43  | 38.74 | 25.50                          | 1.27           | 0.00             | 6.93  |
|      |                    | G    | >100   | 32.83           | 8.06            | 0.00              | 0.96 | 1.61  | 30.26 | 24.54                          | -              | -                | 7.83  |
|      | AG                 | Ap   | 0-20   | 24.23           | 14.07           | 0.00              | 0.08 | 5.08  | 19.07 | 58.05                          | 0.75           | 0.00             | 21.30 |
|      |                    | A    | 20-40  | 15.43           | 6.75            | 0.00              | 0.18 | 2.31  | 12.94 | 43.72                          | 0.48           | 0.00             | 16.11 |
|      |                    | A    | 40-60  | 28.63           | 4.72            | 0.00              | 0.00 | 1.74  | 26.89 | 16.48                          | 0.88           | 0.00             | 6.08  |
|      |                    | AG   | 60-80  | 15.89           | 3.26            | 0.00              | 0.00 | 1.35  | 14.55 | 20.53                          | 0.49           | 0.00             | 8.46  |
|      |                    | G    | 80-100 | 19.03           | 4.17            | 0.00              | 0.00 | 1.22  | 17.81 | 21.92                          | 0.59           | 0.00             | 6.41  |
|      |                    | C    | >100   | 32.48           | 4.41            | 0.00              | 0.00 | 1.12  | 31.36 | 13.58                          | -              | -                | 3.45  |
|      | A                  | Ap   | 0-20   | 14.03           | 4.04            | 0.00              | 0.00 | 1.67  | 12.37 | 28.81                          | 2.47           | 0.72             | 11.87 |
|      |                    | A    | 20-32  | 8.66            | 3.29            | 0.00              | 0.00 | 1.50  | 7.16  | 37.97                          | 1.53           | 0.02             | 17.33 |
|      |                    | Bv   | 32-55  | 6.60            | 1.94            | 0.00              | 0.00 | 1.22  | 5.38  | 29.46                          | 1.16           | 0.00             | 18.42 |
|      |                    | Bv/C | 55-130 | 4.22            | 1.68            | 0.00              | 0.00 | 1.26  | 2.96  | 39.72                          | 0.74           | 0.00             | 29.86 |
|      |                    | C    | >130   | 5.68            | 1.60            | 0.00              | 0.00 | 1.34  | 4.34  | 28.24                          | -              | -                | 23.52 |

Explanations: BP – Biała Podlaska, LU – Lubartów, T – Tarnobrzeg, DG – domestic garden,

AG – allotment garden, A - arable field
