# Supplementary material
Source: MDPI journal article supplement (https://www.mdpi.com/2076-3417/11/19/9018)
Supplement: s1 [file s1]

**Table S1. Basic physicochemical properties of sandy soils**

| City | Land use<br>/<br>Horizon |      | Depth  | pH<br>in<br>H <sub>2</sub> O | pH<br>in<br>KCl | C<br>[g/kg] | N<br>[g/kg] | HA        | S      | CEC    | Soil<br>composition       |
|------|--------------------------|------|--------|------------------------------|-----------------|-------------|-------------|-----------|--------|--------|---------------------------|
|      |                          |      |        |                              |                 |             |             | [mmol/kg] |        |        |                           |
| BP   | DG                       | Ap   | 0-20   | 7.3                          | 7.1             | 37.02       | 2.20        | 8.48      | 101.85 | 110.33 | loamy sand<br>/sand       |
|      |                          | A    | 20-36  | 7.4                          | 7.1             | 32.22       | 2.14        | 7.88      | 102.76 | 110.63 |                           |
|      |                          | A/C  | 36-65  | 7.2                          | 6.8             | 7.20        | 0.59        | 6.60      | 57.19  | 63.79  |                           |
|      |                          | CG   | 65-111 | 6.7                          | 5.9             | 1.47        | 0.19        | 5.48      | 22.36  | 27.83  |                           |
|      |                          | G    | >111   | 6.8                          | 6.0             | 0.51        | 0.13        | 3.38      | 13.95  | 17.32  |                           |
|      | AG                       | Ap   | 0-20   | 6.8                          | 6.5             | 20.95       | 1.70        | 10.50     | 93.70  | 104.20 | loamy sand<br>/sand       |
|      |                          | A    | 20-32  | 6.5                          | 6.0             | 19.27       | 1.59        | 15.00     | 74.77  | 89.77  |                           |
|      |                          | Es   | 32-69  | 5.4                          | 4.4             | 1.71        | 0.28        | 10.28     | 14.48  | 24.75  |                           |
|      |                          | Bhs  | 69-91  | 5.2                          | 4.2             | 0.56        | 0.14        | 6.38      | 17.99  | 24.37  |                           |
|      |                          | CG   | >91    | 5.5                          | 4.5             | 0.60        | 0.12        | 6.15      | 18.91  | 25.06  |                           |
|      | A                        | Ap   | 0-27   | 5.1                          | 3.7             | 8.49        | 0.57        | 21.37     | 10.67  | 32.04  | sand                      |
|      |                          | Es   | 27-47  | 5.1                          | 4.0             | 5.49        | 0.18        | 16.50     | 14.33  | 30.83  |                           |
|      |                          | Bhs  | 47-82  | 5.2                          | 4.2             | 0.75        | 0.12        | 10.50     | 13.56  | 24.06  |                           |
|      |                          | C    | >82    | 5.2                          | 4.2             | 0.52        | 0.10        | 7.12      | 4.62   | 11.74  |                           |
| LU   | DG                       | Ap   | 0-20   | 6.6                          | 6.3             | 21.30       | 1.72        | 9.75      | 92.08  | 101.83 | loamy sand<br>/sand       |
|      |                          | A    | 20-35  | 6.7                          | 6.5             | 10.00       | 0.83        | 6.75      | 68.19  | 74.94  |                           |
|      |                          | Bv   | 35-65  | 6.5                          | 5.9             | 1.56        | 0.10        | 3.75      | 29.81  | 33.56  |                           |
|      |                          | C    | >65    | 6.6                          | 5.9             | 1.20        | 0.00        | 3.00      | 18.79  | 21.79  |                           |
|      | AG                       | Ap   | 0-20   | 6.2                          | 5.5             | 13.80       | 1.15        | 12.52     | 61.44  | 73.96  | loamy sand                |
|      |                          | A    | 20-35  | 5.8                          | 5.1             | 5.79        | 0.57        | 12.25     | 53.74  | 65.99  |                           |
|      |                          | Bhs  | 35-50  | 6.0                          | 5.4             | 3.00        | 2.03        | 9.22      | 43.47  | 52.69  |                           |
|      |                          | G    | 50-67  | 6.2                          | 5.3             | 1.74        | 0.10        | 8.25      | 52.86  | 61.11  |                           |
|      | A                        | C    | >67    | 6.5                          | 5.9             | 1.44        | 0.10        | 3.00      | 15.13  | 18.13  | sand                      |
|      |                          | Ap   | 0-20   | 4.8                          | 4.0             | 8.40        | 0.81        | 17.25     | 17.12  | 34.37  |                           |
|      |                          | Bv   | 20-50  | 4.9                          | 3.7             | 7.64        | 0.62        | 9.75      | 9.84   | 19.59  |                           |
|      |                          | C    | >50    | 6.0                          | 4.4             | 0.84        | 0.10        | 5.47      | 18.98  | 24.45  |                           |
| T    | DG                       | Ap   | 0-20   | 7.3                          | 7.2             | 15.24       | 1.65        | 5.40      | 93.07  | 98.47  | loamy sand                |
|      |                          | A    | 20-40  | 7.2                          | 7.0             | 13.44       | 1.52        | 6.38      | 94.08  | 100.45 |                           |
|      |                          | A    | 40-65  | 6.8                          | 6.3             | 10.84       | 1.23        | 7.50      | 90.01  | 97.51  |                           |
|      |                          | AG   | 65-90  | 6.8                          | 6.2             | 6.48        | 0.68        | 6.75      | 87.12  | 93.87  |                           |
|      |                          | G    | >100   | 7.0                          | 6.3             | 2.58        | 0.38        | 4.73      | 86.13  | 90.86  |                           |
|      | AG                       | Ap   | 0-20   | 7.0                          | 7.0             | 13.39       | 1.29        | 6.15      | 78.49  | 84.64  | loamy sand<br>/sandy loam |
|      |                          | A    | 20-40  | 7.1                          | 7.1             | 7.63        | 0.81        | 4.50      | 65.36  | 69.86  |                           |
|      |                          | A    | 40-60  | 7.0                          | 6.6             | 4.68        | 0.52        | 4.28      | 47.58  | 51.85  |                           |
|      |                          | AG   | 60-80  | 7.0                          | 6.5             | 1.98        | 0.28        | 3.38      | 32.49  | 35.87  |                           |
|      |                          | G    | 80-100 | 7.0                          | 6.0             | 2.25        | 0.40        | 4.65      | 71.97  | 76.62  |                           |
|      | A                        | C    | >100   | 6.8                          | 5.8             | 1.08        | 0.42        | 5.10      | 92.81  | 97.91  | sand                      |
|      |                          | Ap   | 0-20   | 4.3                          | 3.8             | 7.32        | 0.73        | 22.88     | 10.61  | 33.49  |                           |
|      |                          | A    | 20-32  | 4.3                          | 3.7             | 5.22        | 0.56        | 23.03     | 8.13   | 31.15  |                           |
|      |                          | Bv   | 32-55  | 4.6                          | 4.1             | 1.53        | 0.15        | 10.35     | 8.25   | 18.60  |                           |
|      |                          | Bv/C | 55-130 | 4.7                          | 4.2             | 0.93        | 0.08        | 6.00      | 5.80   | 11.80  |                           |
|      | C                        | >130 | 4.7    | 4.3                          | 0.66            | 0.09        | 5.85        | 6.37      | 12.22  |        |                           |

Explanations: BP – Biała Podlaska, LU – Lubartów, T – Tarnobrzeg, DG – domestic garden,

AG – allotment garden, A – arable field
