# Supplementary material
Source: MDPI journal article supplement (https://www.mdpi.com/2076-3417/11/19/9018)
Supplement: s1 [file s1]

**Table S4. Content of the forms and values of Cu pollution indices in silty soils**

| City | Land use / Horizon |      | Depth   | Cu <sub>t</sub> | Cu <sub>a</sub> | Fractions [mg/kg] |      |      |       | Cu indices                     |                |                  |       |
|------|--------------------|------|---------|-----------------|-----------------|-------------------|------|------|-------|--------------------------------|----------------|------------------|-------|
|      |                    |      |         | [mg/kg]         |                 | I                 | II   | III  | IV    | C <sub>a</sub> /C <sub>t</sub> | C <sub>f</sub> | I <sub>geo</sub> | BF    |
| LB   | DG                 | Ap   | 0-27    | 12.63           | 6.58            | 0.01              | 0.83 | 3.55 | 8.23  | 52.12                          | 1.35           | 0.00             | 34.80 |
|      |                    | A/Et | 27-60   | 7.06            | 3.45            | 0.12              | 0.69 | 3.24 | 3.00  | 48.84                          | 0.75           | 0.00             | 57.49 |
|      |                    | Bt   | 60-85   | 6.83            | 2.55            | 0.00              | 0.61 | 3.05 | 3.16  | 37.35                          | 0.73           | 0.00             | 53.64 |
|      |                    | C    | >85     | 9.38            | 2.29            | 0.67              | 0.56 | 3.14 | 5.01  | 24.37                          | -              | -                | 46.55 |
|      | AG                 | Ap   | 0-25    | 30.48           | 8.29            | 0.00              | 0.56 | 3.07 | 26.85 | 27.21                          | 1.14           | 0.00             | 11.91 |
|      |                    | Et   | 25-45   | 27.83           | 6.28            | 0.00              | 0.76 | 2.87 | 24.20 | 22.55                          | 1.04           | 0.00             | 13.03 |
|      |                    | Bt   | 45-55   | 25.13           | 7.30            | 0.00              | 0.82 | 2.63 | 21.68 | 29.03                          | 0.94           | 0.00             | 1373  |
|      |                    | C    | >55     | 26.83           | 5.44            | 0.15              | 0.81 | 2.78 | 23.08 | 20.27                          | -              | -                | 13.97 |
|      | A                  | Ap   | 0-25    | 30.83           | 4.60            | 0.37              | 1.28 | 1.40 | 27.78 | 14.92                          | 0.95           | 0.00             | 9.89  |
|      |                    | Et   | 25-50   | 27.08           | 3.64            | 0.45              | 0.96 | 1.98 | 23.69 | 13.43                          | 0.83           | 0.00             | 12.53 |
|      |                    | Bt1  | 50-60   | 39.28           | 4.34            | 0.59              | 0.95 | 1.51 | 36.23 | 11.04                          | 1.21           | 0.00             | 7.77  |
|      |                    | Bt2  | 60-80   | 39.43           | 4.50            | 0.29              | 1.01 | 1.61 | 36.52 | 11.41                          | 1.21           | 0.00             | 7.37  |
|      |                    | Bt/C | 80-100  | 34.18           | 3.48            | 0.22              | 0.95 | 1.59 | 31.43 | 10.19                          | 1.05           | 0.00             | 8.05  |
|      |                    | C    | 100-120 | 32.53           | 2.90            | 0.16              | 1.21 | 3.08 | 28.08 | 8.90                           | -              | 0.00             | 13.66 |
|      |                    | C    | 120-140 | 31.33           | 2.54            | 0.29              | 0.86 | 2.94 | 27.24 | 8.11                           | -              | -                | 13.06 |
| P    | DG                 | Ap   | 0-20    | 39.18           | 8.77            | 0.00              | 0.60 | 1.51 | 37.00 | 22.37                          | 0.93           | 0.00             | 5.58  |
|      |                    | A    | 20-41   | 31.68           | 8.45            | 0.03              | 0.68 | 1.88 | 29.08 | 26.68                          | 0.75           | 0.00             | 8.19  |
|      |                    | Et   | 41-67   | 34.83           | 4.25            | 0.10              | 0.60 | 1.14 | 32.98 | 12.21                          | 0.83           | 0.00             | 5.31  |
|      |                    | Bt1  | 67-130  | 41.73           | 4.63            | 0.08              | 0.74 | 1.00 | 39.91 | 11.10                          | 0.99           | 0.00             | 4.37  |
|      |                    | Bt2  | 130-150 | 40.68           | 4.19            | 0.12              | 0.80 | 1.19 | 38.56 | 10.30                          | 0.97           | 0.00             | 5.21  |
|      |                    | C    | >150    | 42.08           | 4.04            | 0.17              | 0.64 | 0.91 | 40.36 | 9.59                           | -              | -                | 4.09  |
|      | AG                 | Ap   | 0-20    | 46.18           | 13.57           | 7.06              | 4.21 | 2.23 | 32.68 | 29.38                          | 1.23           | 0.00             | 29.24 |
|      |                    | A    | 20-33   | 44.13           | 10.18           | 0.00              | 1.79 | 2.97 | 39.37 | 23.06                          | 1.17           | 0.00             | 10.78 |
|      |                    | Et   | 33-59   | 33.48           | 6.62            | 0.00              | 1.81 | 1.41 | 30.25 | 19.77                          | 0.89           | 0.00             | 9.64  |
|      |                    | Bt1  | 59-95   | 28.38           | 5.75            | 0.00              | 1.73 | 1.61 | 25.04 | 20.26                          | 0.76           | 0.00             | 11.78 |
|      |                    | Bt2  | 95-128  | 29.33           | 4.97            | 0.00              | 1.56 | 1.24 | 26.53 | 16.94                          | 0.78           | 0.00             | 9.55  |
|      |                    | C    | >128    | 37.58           | 4.13            | 0.00              | 0.91 | 0.95 | 35.72 | 10.99                          | -              | -                | 4.94  |
|      | A                  | Ap   | 0-25    | 43.13           | 5.34            | 0.15              | 0.10 | 1.42 | 41.45 | 12.38                          | 1.29           | 0.00             | 3.89  |
|      |                    | Bt1  | 25-40   | 45.48           | 4.28            | 0.17              | 0.39 | 1.13 | 43.78 | 9.40                           | 1.36           | 0.00             | 3.73  |
|      |                    | Bt2  | 40-88   | 50.03           | 4.18            | 0.23              | 0.64 | 1.19 | 47.98 | 8.35                           | 1.50           | 0.00             | 4.10  |
|      |                    | C    | >88     | 33.38           | 6.32            | 0.22              | 0.85 | 1.35 | 30.97 | 18.92                          | -              | -                | 7.23  |
| Z    | DG                 | Ap   | 0-24    | 38.83           | 25.00           | 1.55              | 3.71 | 9.42 | 24.16 | 64.38                          | 1.64           | 0.12             | 37.78 |
|      |                    | Et   | 24-60   | 22.66           | 12.30           | 1.49              | 2.70 | 5.16 | 13.32 | 54.27                          | 0.96           | 0.00             | 41.23 |
|      |                    | Bt   | 60-104  | 33.58           | 23.97           | 1.51              | 3.12 | 5.59 | 23.36 | 71.37                          | 1.42           | 0.00             | 30.43 |
|      |                    | C    | >104    | 23.73           | 5.47            | 2.86              | 2.97 | 4.03 | 13.87 | 23.03                          | -              | -                | 41.56 |
|      | AG                 | Ap   | 0-27    | 37.33           | 6.18            | 1.81              | 2.63 | 5.25 | 27.64 | 16.56                          | 1.03           | 0.00             | 25.96 |
|      |                    | Bt   | 27-82   | 32.38           | 4.12            | 4.37              | 4.09 | 4.68 | 19.23 | 12.71                          | 0.89           | 0.00             | 40.61 |
|      |                    | C    | >82     | 36.28           | 5.32            | 2.33              | 2.39 | 4.05 | 27.51 | 14.66                          | -              | -                | 24.16 |
|      | A                  | Ap   | 0-23    | 26.88           | 6.80            | 2.16              | 2.28 | 4.19 | 18.25 | 25.30                          | 1.23           | 0.00             | 32.11 |
|      |                    | Et   | 23-39   | 29.28           | 5.32            | 1.70              | 2.24 | 3.72 | 21.62 | 18.17                          | 1.34           | 0.00             | 26.17 |
|      |                    | Bt   | 39-101  | 35.53           | 5.02            | 3.27              | 4.06 | 3.62 | 24.58 | 14.14                          | 1.62           | 0.11             | 30.83 |
|      |                    | C    | >101    | 21.93           | 4.73            | 1.94              | 3.48 | 3.21 | 13.30 | 21.57                          | -              | -                | 39.36 |

Explanations: LB – Lublin, P – Przemyśl, Z – Zamość, DG – domestic garden, AG –

allotment garden, A - arable field
