# Supplementary material
Source: MDPI journal article supplement (https://www.mdpi.com/2076-3417/11/19/9018)
Supplement: s1 [file s1]

**Table S2. Basic physicochemical properties of silty soils**

| City | Land use<br>/<br>Horizon |      | Depth   | pH<br>in<br>H <sub>2</sub> O | pH in<br>KCl | C<br>[g/kg] | N<br>[g/kg] | HA        | S      | CEC    | Soil<br>composition |
|------|--------------------------|------|---------|------------------------------|--------------|-------------|-------------|-----------|--------|--------|---------------------|
|      |                          |      |         |                              |              |             |             | [mmol/kg] |        |        |                     |
| LB   | DG                       | Ap   | 0-27    | 6.7                          | 6.5          | 5.85        | 9.08        | 7.50      | 63.97  | 71.47  | loamy sand          |
|      |                          | A/Et | 27-60   | 6.9                          | 5.8          | 2.40        | 11.43       | 6.37      | 22.24  | 28.61  |                     |
|      |                          | Bt   | 60-85   | 6.5                          | 5.1          | 1.44        | 17.14       | 6.00      | 15.46  | 21.46  |                     |
|      |                          | C    | >85     | 6.3                          | 5.1          | 0.99        | 9.90        | 5.62      | 26.15  | 31.77  |                     |
|      | AG                       | Ap   | 0-25    | 7.9                          | 7.6          | 8.83        | 9.29        | 3.38      | 89.40  | 92.78  | silt loam           |
|      |                          | Et   | 25-45   | 8.4                          | 7.8          | 1.29        | 4.96        | 2.40      | 86.08  | 88.48  |                     |
|      |                          | Bt   | 45-55   | 8.6                          | 8.0          | 1.17        | 5.57        | 2.40      | 57.76  | 60.16  |                     |
|      |                          | C    | >55     | 8.5                          | 7.9          | 1.08        | 5.14        | 2.80      | 86.48  | 89.28  |                     |
|      | A                        | Ap   | 0-25    | 7.7                          | 7.5          | 6.86        | 7.22        | 4.65      | 76.78  | 81.43  | silt loam           |
|      |                          | Et   | 25-50   | 7.2                          | 6.3          | 3.48        | 8.29        | 6.90      | 53.41  | 60.31  |                     |
|      |                          | Bt1  | 50-60   | 6.7                          | 5.4          | 2.60        | 6.84        | 10.35     | 73.60  | 83.95  |                     |
|      |                          | Bt2  | 60-80   | 6.6                          | 5.2          | 2.12        | 6.06        | 11.78     | 77.62  | 89.40  |                     |
|      |                          | Bt/C | 80-100  | 6.6                          | 5.1          | 1.88        | 7.83        | 10.13     | 77.47  | 87.60  |                     |
|      |                          | C    | 100-120 | 6.4                          | 5.1          | 1.76        | 7.33        | 9.53      | 63.68  | 73.20  |                     |
|      |                          |      | C       | 120-140                      | 6.2          | 4.8         | 0.96        | 5.65      | 8.25   | 59.74  | 67.99               |
| P    | DG                       | Ap   | 0-20    | 6.7                          | 6.2          | 16.13       | 1.80        | 12.53     | 96.95  | 109.47 | silt loam           |
|      |                          | A    | 20-41   | 6.6                          | 6.0          | 13.39       | 1.55        | 12.98     | 91.82  | 104.79 |                     |
|      |                          | Et   | 41-67   | 6.4                          | 5.3          | 2.49        | 0.88        | 10.73     | 86.89  | 97.61  |                     |
|      |                          | Bt1  | 67-130  | 6.2                          | 4.9          | 2.06        | 0.43        | 11.78     | 93.77  | 105.55 |                     |
|      |                          | Bt2  | 130-150 | 5.5                          | 4.3          | 1.26        | 0.35        | 14.03     | 91.18  | 105.20 |                     |
|      |                          | C    | >150    | 5.7                          | 4.3          | 1.34        | 0.32        | 13.28     | 90.93  | 104.20 |                     |
|      | AG                       | Ap   | 0-20    | 7.3                          | 7.3          | 15.40       | 1.72        | 6.00      | 113.43 | 119.43 | silt loam           |
|      |                          | A    | 20-33   | 7.4                          | 7.2          | 12.60       | 1.50        | 6.00      | 113.33 | 119.33 |                     |
|      |                          | Et   | 33-59   | 7.4                          | 7.1          | 6.26        | 0.85        | 6.15      | 102.53 | 108.68 |                     |
|      |                          | Bt1  | 59-95   | 7.5                          | 6.8          | 4.94        | 0.67        | 4.88      | 83.56  | 88.44  |                     |
|      |                          | Bt2  | 95-128  | 7.5                          | 6.8          | 5.40        | 0.45        | 5.25      | 79.53  | 84.78  |                     |
|      |                          | C    | >128    | 7.5                          | 6.6          | 2.94        | 0.73        | 4.50      | 86.14  | 90.64  |                     |
|      | A                        | Ap   | 0-25    | 7.1                          | 6.5          | 9.02        | 1.15        | 7.50      | 98.09  | 105.59 | silt loam           |
|      |                          | Bt1  | 25-40   | 7.3                          | 6.2          | 2.46        | 0.49        | 6.15      | 88.24  | 94.39  |                     |
|      |                          | Bt2  | 40-88   | 7.4                          | 6.1          | 1.10        | 0.32        | 5.85      | 85.10  | 90.95  |                     |
|      |                          | C    | >88     | 7.5                          | 6.1          | 1.22        | 0.26        | 5.03      | 91.06  | 96.08  |                     |
| Z    | DG                       | Ap   | 0-24    | 7.7                          | 7.3          | 19.12       | 1.64        | 3.23      | 94.36  | 97.59  | silt loam           |
|      |                          | Et   | 24-60   | 7.8                          | 7.5          | 6.24        | 0.81        | 2.48      | 95.72  | 98.20  |                     |
|      |                          | Bt   | 60-104  | 7.8                          | 7.4          | 6.96        | 0.88        | 3.00      | 92.23  | 95.23  |                     |
|      |                          | C    | >104    | 7.7                          | 7.5          | 1.88        | 0.32        | 3.53      | 74.68  | 78.20  |                     |
|      | AG                       | Ap   | 0-27    | 7.5                          | 7.0          | 8.52        | 1.17        | 3.75      | 97.99  | 101.74 | silt loam           |
|      |                          | Bt   | 27-82   | 7.9                          | 7.1          | 1.17        | 0.26        | 3.00      | 85.23  | 88.23  |                     |
|      |                          | C    | >82     | 8.2                          | 7.7          | 0.56        | 0.18        | 2.25      | 94.18  | 96.43  |                     |
|      | A                        | Ap   | 0-23    | 6.8                          | 6.5          | 16.20       | 1.73        | 6.98      | 98.15  | 105.12 | silt loam           |
|      |                          | Et   | 23-39   | 7.0                          | 6.7          | 5.79        | 0.84        | 4.50      | 90.23  | 94.73  |                     |
|      |                          | Bt   | 39-101  | 7.3                          | 6.5          | 1.95        | 0.49        | 3.98      | 103.42 | 107.39 |                     |
| C    |                          | >101 | 7.9     | 7.6                          | 0.80         | 0.25        | 2.25        | 97.38     | 99.63  |        |                     |

Explanations: LB – Lublin, P – Przemyśl, Z – Zamość, DG – domestic garden, AG –

allotment garden, A - arable field
